# Supplementary material for: Cell-Based Sensors for the Detection of EGF and EGF-Stimulated Ca2+ Signaling
Source: MDPI journal article supplement (doi:10.3390/bios13030383), 2023-03-14
Supplement: s1 [file s1]

Supporting Information

# Cell-Based Sensors for the Detection of EGF and EGF-Stimulated $\text{Ca}^{2+}$ Signaling

Euiyeon Lee <sup>1,2,†</sup>, Keshab Lal Shrestha <sup>1,†</sup>, Seonhye Kang <sup>1</sup>, Neethu Ramakrishnan <sup>1</sup> and Youngeun Kwon <sup>1,\*</sup>

<sup>1</sup> Department of Biomedical Engineering, Dongguk University, Seoul 04620, Republic of Korea

<sup>2</sup> Department of Chemistry and Chemical Biology, Rutgers University, Piscataway, NJ 08854, USA

\* Correspondence: ykwon@dongguk.edu

† These authors contributed equally to this work.

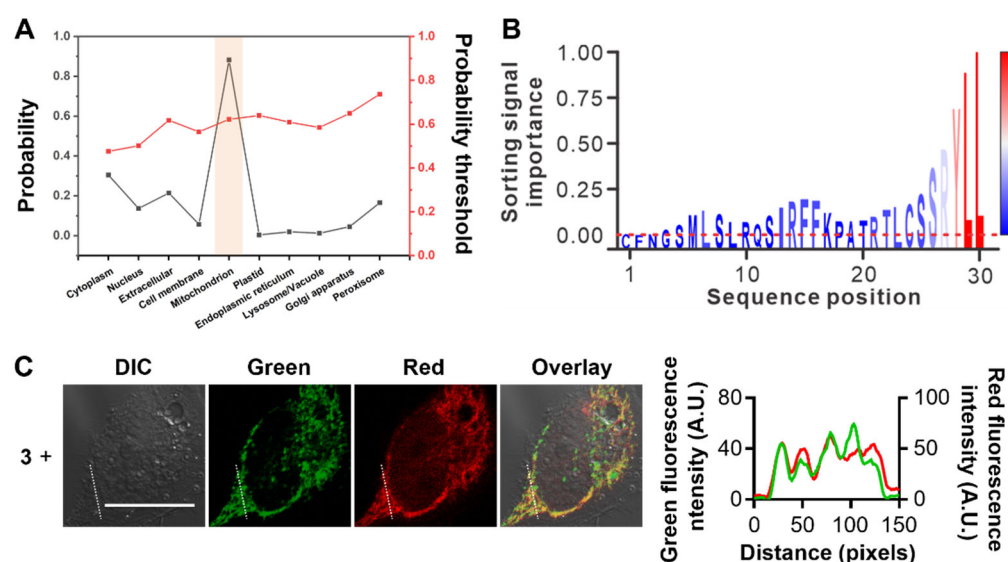

**Figure S1.** Tests of designed modified mitochondrial targeting sequence (rMTS) for the sensor cells based on predict programs. **(A)** The predicted rMTS location is mitochondria. Probability is compared against probability threshold and only mitochondrial probability is above the probability threshold. **(B)** Sequence LOGOs shows the amino acid sequence of high importance associated with the mitochondrial transit signal among the rMTS sequences. **(C)** The delivery of an AFP into the mitochondria by rMTS was confirmed by monitoring the cellular localization of the fusion protein 3 (scale bar = 20  $\mu\text{m}$ ).
